# Supplementary material for: The Prognostic and Therapeutic Role of Genomic Subtyping by Sequencing Tumor or Cell-Free DNA in Pulmonary Large-Cell Neuroendocrine Carcinoma
Source: Oxford University Press journal article supplement (doi:10.1158/1078-0432.ccr-19-0556), 2019-11-06
Supplement: 10780432ccr190556-sup-217300_3_supp_5807034_pyn85s.xlsx [file 10780432ccr190556-sup-217300_3_supp_5807034_pyn85s.xlsx]

## Sheet: Sheet1
Supplementary Table S5.Genes shared in both cancer panels used in tumor DNA sequencing of MDA-Cohort and BJ-Cohort .
AKT1	CDKN2A	ERBB4	FGFR3	KDR	MLH1	PIK3CA	RET
ALK	CTNNB1	FBXW7	FLT3	KIT	NOTCH1	PTEN	SMO
ATM	EGFR	FGFR1	HRAS	KRAS	NRAS	PTPN11	STK11
BRAF	ERBB2	FGFR2	JAK2	MET	PDGFRA	RB1	TP53
