# Supplementary material for: The Prognostic and Therapeutic Role of Genomic Subtyping by Sequencing Tumor or Cell-Free DNA in Pulmonary Large-Cell Neuroendocrine Carcinoma
Source: Oxford University Press journal article supplement (doi:10.1158/1078-0432.ccr-19-0556), 2019-11-06
Supplement: 10780432ccr190556-sup-217300_3_supp_5807059_pyn85s.xlsx [file 10780432ccr190556-sup-217300_3_supp_5807059_pyn85s.xlsx]

## Sheet: Sheet1
Supplementary Table S7:The genomic classification based tumor DNA and cfDNA
Patient ID	Tissue	ctDNA
A01	NSCLC-like	NSCLC-like
A02	NSCLC-like	NSCLC-like
A04	NSCLC-like	NSCLC-like
A05	SCLC-like	NSCLC-like
A06	SCLC-like	SCLC-like
A07	SCLC-like	SCLC-like
A08	SCLC-like	NSCLC-like
A10	NSCLC-like	NSCLC-like
A11	NSCLC-like	NSCLC-like
A12	NSCLC-like	NSCLC-like
A13	NSCLC-like	NSCLC-like
A14	NSCLC-like	NSCLC-like
A15	NSCLC-like	NSCLC-like
A16	NSCLC-like	NSCLC-like
A17	NSCLC-like	NSCLC-like
A18	NSCLC-like	NSCLC-like
A19	SCLC-like	SCLC-like
A21	NSCLC-like	NSCLC-like
A22	NSCLC-like	NSCLC-like
A23	NSCLC-like	NSCLC-like
